# Supplementary material for: 5′ Untranslated Region Elements Show High Abundance and Great Variability in Homologous ABCA Subfamily Genes
Source: MDPI journal article supplement (doi:10.3390/ijms21228878), 2020-11-23
Supplement: s1 [file s1]

**Figure S5.** The location of 13 SNVs, found in breast cancer patients, in relation to the 5'UTR features of ABCA genes.

AAA RNA G quadruplex-forming sequence

TTT Highly conserved sequence

ATG Upstream ATG codon

↓ Intron position

>A1\_Human

GTAATTGCGAGCGAGAGTGAGTGGGGCCGGGACCCGCAGAGCCGAGCCGACCCTTCTCTC  
CCGGGCTGCGGCAGGGCAGGGCGGGGAGCTCCGCGCACCAACAGAGCCGGTTCTCAGGGC  
GCTTTGCTCCTTGTTTTTTCCCGGTTCTGTTTTCTCCCTTCTCCGGAAGGCTTGTCAA  
GGGGTAGGAGAAAGAGACGCAAACACAAAAGTGGAAAACAG↓TTAATGACCAGCCACGGCG  
TCCCTGCTGTGAGCTCTGGCCGCTGCCTTCCAGGGCTCCCAGCCACACGCTGGGGGTGC  
TGGCTGAGGGAAC

rs111292742

rs1799777

rs1800978

.....(((.(((.((((((.(((((((.....(((((.(((((.(((((.((((.....  
..)))...)))..)))..)))..)))..)))..)))..((((((((((((.....(((((.  
(((...)).)))..)))..)))..)))..)))..)))..)))..)))..)))..)))..)))..  
))....)))))..(((.....(((.....))....))....))....))....))....))....  
....)))))..)))..)))..)))..)))..)))..)))..)))..)))..)))..)))..  
)))..)))..)))..)))..)))..)))..)))..)))..)))..)))..)))..)))..

>A2\_Human

GCGCGGGCGATGCCCAGCGGCGCGGCGGGCTGCGGGGCCCCGGCGGGGCGCGCAGAGGAGC  
GGGCGCGGCGCTGAGGCGGCGGAGCGTGGCCCCGCC  
(((.(((.((((((.(((.(((.((((((((((.....)))))..(((.(((.((((.....))  
).)))..)))..)))..)))..)))..)))..)))..)))..)))..)))..)))..)))..

AGTAGCGGGTTGCAGGCGCACCTCCCCTCCAGGGCGGCCACGCAGCTGTCAGTGCCGCC  
GCCACTGCGAGGCTGGAGCGGAGCCCGGGTGGCCGAGGGAGGGGACCCCGCAGAGGGCC

rs146642275

rs45518738

rs45487892

rs45518738

rs45487892

rs45518738

rs45487892

rs45487892

rs45487892

rs45487892

[illegible]

GGACACAGCGTCCGGAGCCAGAGGCGCTCTTAACGGCGTTTATGTCCTTTGCTGTCTGAG  
GGGCCTCAGCTCTGACCAATCTGGTCTTCGTGTGGTCATTAGC  
(((.....)))((((..((((..((((((((((((.....)))))).))))))  
)))))))).))))(((((.....))))). . . . .

ACAGATCCCAGCTGGGTCA~~CCCCG~~CACTGAGTCAACAGACTGAGCGCGTCCAGGCCTGACA  
GCTCTGCGGCTCGGGCCCTGAG↓GTTTATTCA~~GAAAA~~C  
...((((((.....))))). ...(((.(.(((((.....))))).)).)). ...(((((((.....  
((((.....))))))))))(((((((.....)))))).....

[illegible][illegible]

rs3752229

ATAACCTCCACTCTGAAAGCAGTCTTCACAGAAACTTTTCACAGAAGTCAAATAGTTAAA  
GCAAATTCTAGATACATGGTAGAGACCAGGAGAAAAATATGAATAACTTCTCTCTAAACAA  
GGAGCTCAGTGGATAAACCATACCTCTAGATTCCTTGCTTCATTTTCCCAGAA↓GTTTTG  
GTAGCAGGATGATGTTGGCCTCATAATGTGAGTTAGAGAGGAGTCCCTCTTTTTTCGACTG  
TTTGAATTGTTTCAGAAGGAATGCTACCAGCTCCTCTGTACCACTGGTAGAATTCAGC  
TGTGAATCTGTCTGGTCCTGGGCTTTTTTTGATTG↓ACAAG

>A9\_Human

AGAACATGCAGAGACCATGGATGAACGTGTTTCTAGATTTTCCTCCAGCTTTCCTGA  
GA↓GAAACAGGTCAAA

(((((.( (((((... ((...)) .....)))))))).(((((((.( (((((.....))) .  
)))..))..))....

TAGTAGTACTAACAACGTTTTATAGGAGCACAATTAATTTTACTTAGGATAAGTGTGTGT  
 ATTATTGTTTTTATTGTTGTTCTGTTAGTTACTCAAACTTCATTCTAATTGTGCCCTGA  
 GTTTGTTAAATACCATACTGTATTTTTGTGTAAACATGTAAATAGGCATTAATTTTTGAG  
 AAATAGAAATGTTTATCCTTAATGTATTTTTTAATTGCTAACATTGATTTTTTATTTTCT  
 TTCCTGAAATAGCTTATTTCCCTAAAATGAAAGAATTTATTCTCAGATGAATAATTTTTTAT  
 ATCAGCTATTCTTATCAGAGCAATAAACAAATACCAATGATGCGCTCAGCCAACAATTCA  
 TTACACTCTCTGAAGAGTAACTGGACAAGGAGAAAAACATAGGGAAAAACCAACAGAAT  
 TTGTTGGCATGTTCTACACACAGACCATGGCTTTTCAGAAGCCAAGCTGAATCAAAACAG  
 TTTTAAAAGAGGCAACCATTTGTAGAGGAGTCCTGAAGGATTCTTCATTGTTTTCTTGG  
 ACAAAAAGAGACCAGTGGATCCAAGTGCTTCAAATACTTCTCTTATTTTCTTAACCTCT  
 ATTGCTCTGCAATATTTACTTTACCCTGTAAATGAACAGGACAAAATGTTAAAAAAGAG  
 ATAAGCGTGCGTCAACAAATTCAGGCTCTTCTGTACAAGAATTTTCTTAAAAAATGGAGA  
 ATAAAAAGAGAGTTTATTGGAATGGACAATAACATTGTTTCTAGGGCTATATTTGTGCAT  
 CTTTTCGGAACACTTCAGAGCTACCCGTTTTCTGAACAACCTCCTAAAGTCCTGGGAAG  
 CGTGGATCAGTTTAATGACTCTGGCCTGGTAGTGGCATATACACCAGTCAGTAACATAAC  
 ACAAAGGATA

rs1024510317

[illegible]

>A12\_Human

GTGGATAGGCAATTAATTTCA**ATG**GAGAGTAGGAGGTGTGGGTTCAGCTGCTGCTTTTTTT  
TTTTTTTCAGTGAGGC**ATTATCTGAATGATGCTCATTCTCT**CTTGAGTCTGGACTTCGTG  
CAACAAGCAGCAACTGGATATTATTTTAA**AATAAGCATAAGCCACCCAAAGATACTGATC**  
**TGGGTCCT**TCTTTTGAAGAAGAGTTGATTGAGAAGTGCCTCTTGGTTAAGGATTAACCA  
CAGGGAAAAATCCAGCAGAAACAGAAGAACTGTGGGTTTCTTACCCCAGCCCTCAAGG**AA**  
**GCTATGCCGTGAAAGGG**GTACTGATACACTGACATACAGCAAGTTGGACGGGGCATCAGT  
TCTTCATTTGTGGAGTGGAGAAAAGAAGAGGAAATCTCTCATTTGGGGCATTTGAAGG  
.....((((((((((.....((((((.....((((((((((.....((((((((.....  
.....((((((((.....))))))))))))))))))))))))))))))))))))))))))))  
)).....))))))))))))))))))))))))))))))))))))))))))))))))))))  
).....))))))))))))))))))))))))))))))))))))))))))))))))))))  
...))))))))))))))))))))))))))))))))))))))))))))))))))))))))  
...((((.....)).....((((((((((((((((((((.....))))))))))))))))  
((((((((((((.....))))))))))))))))))))))))))))))))))))))))))))  
)))))).....))))))))))))))))))))))))))))))))))))))))))))))))  
)))))).....

>A13\_Human

CTGACTGAGAGCAGGGAGCAGCAGGC  
(((.....))))))..
