# Supplementary material for: 5′ Untranslated Region Elements Show High Abundance and Great Variability in Homologous ABCA Subfamily Genes
Source: MDPI journal article supplement (doi:10.3390/ijms21228878), 2020-11-23
Supplement: s1 [file s1]

**Table S1:** Basic characteristics of the transcripts downloaded and analyzed in the study (Ensembl release 99 - January 2020 © EMBL-EBI).

| Gene/<br>No. of<br>Tr. | Species (Assembly)                            | Tr. Name   | Tr. ID                                | Tr.<br>Length<br>(bp) | Protein<br>Length<br>(aa) |
|------------------------|-----------------------------------------------|------------|---------------------------------------|-----------------------|---------------------------|
| ABCA1                  |                                               |            |                                       |                       |                           |
| 1                      | Human (GRCh38.p13)                            | ABCA1-202  | <a href="#">ENST00000374736.8</a>     | 10408                 | <a href="#">2261aa</a>    |
| 2                      | Marmoset (ASM275486v1)                        | ABCA1-203  | <a href="#">ENSCJAT00000082284.2</a>  | 7069                  | <a href="#">2256aa</a>    |
| 3                      | Angola colobus (Cang.pa_1.0)                  | ABCA1-201  | <a href="#">ENSCANT00000035942.1</a>  | 10490                 | <a href="#">2261aa</a>    |
| 4                      | Golden Hamster (MesAur1.0)                    | Abca1-201  | <a href="#">ENSMAUT00000018446.1</a>  | 10229                 | <a href="#">2261aa</a>    |
| 5                      | Mouse (GRCm38.p6)                             | Abca1-201  | <a href="#">ENSMUST00000030010.3</a>  | 10262                 | <a href="#">2261aa</a>    |
| 6                      | Arabian camel (CamDro2)                       | ABCA1-201  | <a href="#">ENSCDRT000005020754.1</a> | 8207                  | <a href="#">2261aa</a>    |
| 7                      | Canada lynx (mLynCan4_v1.p)                   | ABCA1-201  | <a href="#">ENSLCNT000005022774.1</a> | 7890                  | <a href="#">2261aa</a>    |
| 8                      | Armadillo (Dasnov3.0)                         | ABCA1-201  | <a href="#">ENSDNOT00000009223.3</a>  | 7192                  | <a href="#">2264aa</a>    |
| 9                      | Emu (droNov1)                                 | ABCA1-201  | <a href="#">ENSDNVT00000000545.1</a>  | 7036                  | <a href="#">2261aa</a>    |
| 10                     | Three-toed box turtle (T_m_triunguis-2.0)     | ABCA1-201  | <a href="#">ENSTMTT00000004136.1</a>  | 8530                  | <a href="#">2200aa</a>    |
| 11                     | Coelacanth (LatCha1)                          | ABCA1-201  | <a href="#">ENSLACT00000009960.1</a>  | 5299                  | <a href="#">1525aa</a>    |
| ABCA2                  |                                               |            |                                       |                       |                           |
| 1                      | Human (GRCh38.p13)                            | ABCA2-202  | <a href="#">ENST00000341511.11</a>    | 8103                  | <a href="#">2436aa</a>    |
| 2                      | Capuchin (Cebus_imitator-1.0)                 | ABCA2-202  | <a href="#">ENSCCAT00000050655.1</a>  | 8097                  | <a href="#">2434aa</a>    |
| 3                      | Sooty mangabey (Caty_1.0)                     | ABCA2-201  | <a href="#">ENSCATT00000064419.1</a>  | 8417                  | <a href="#">2549aa</a>    |
| 4                      | Golden Hamster (MesAur1.0)                    | Abca2-201  | <a href="#">ENSMAUT00000001022.1</a>  | 8185                  | <a href="#">2434aa</a>    |
| 5                      | Mouse (GRCm38.p6)                             | Abca2-201  | <a href="#">ENSMUST00000102919.3</a>  | 8033                  | <a href="#">2433aa</a>    |
| 6                      | Ferret (MusPutFur1.0)                         | ABCA2-201  | <a href="#">ENSMPUT00000010911.1</a>  | 9291                  | <a href="#">2365aa</a>    |
| 7                      | Donkey (ASM303372v1)                          | ABCA2-201  | <a href="#">ENSEAST000005027735.1</a> | 8803                  | <a href="#">2748aa</a>    |
| 8                      | Painted turtle (Chrysemys_picta_bellii-3.0.3) | ABCA2-201  | <a href="#">ENSCPBT000000017126.1</a> | 7756                  | <a href="#">2480aa</a>    |
| 9                      | Duck (CAU_duck1.0)                            | ABCA2-201  | <a href="#">ENSAPLT00000036122.1</a>  | 10196                 | <a href="#">2437aa</a>    |
| 10                     | Anole lizard (AnoCar2.0)                      | ABCA2-201  | <a href="#">ENSACAT00000007708.3</a>  | 7435                  | <a href="#">2393aa</a>    |
| 11                     | Denticle herring (fDenClu1.1)                 | abca2-201  | <a href="#">ENSDCDT00000031988.1</a>  | 8822                  | <a href="#">2512aa</a>    |
| ABCA3                  |                                               |            |                                       |                       |                           |
| 1                      | Human (GRCh38.p13)                            | ABCA3-201  | <a href="#">ENST00000301732.10</a>    | 6602                  | <a href="#">1704aa</a>    |
| 2                      | Angola colobus (Cang.pa_1.0)                  | ABCA3-201  | <a href="#">ENSCANT00000012088.1</a>  | 6448                  | <a href="#">1704aa</a>    |
| 3                      | Capuchin (Cebus_imitator-1.0)                 | ABCA3-201  | <a href="#">ENSCCAT00000057064.1</a>  | 6811                  | <a href="#">1703aa</a>    |
| 4                      | Guinea Pig (Cavpor3.0)                        | ABCA3-201  | <a href="#">ENSCPOT00000038719.1</a>  | 6790                  | <a href="#">1704aa</a>    |
| 5                      | Mouse (GRCm38.p6)                             | Abca3-201  | <a href="#">ENSMUST00000039013.14</a> | 6476                  | <a href="#">1704aa</a>    |
| 6                      | Leopard (PanPar1.0)                           | ABCA3-202  | <a href="#">ENSPPRT00000016709.1</a>  | 6348                  | <a href="#">1704aa</a>    |
| 7                      | Arabian camel (CamDro2)                       | ABCA3-201  | <a href="#">ENSCDRT000005025167.1</a> | 5970                  | <a href="#">1703aa</a>    |
| 8                      | Armadillo (Dasnov3.0)                         | ABCA3-201  | <a href="#">ENSDNOT00000050172.1</a>  | 10886                 | <a href="#">1728aa</a>    |
| 9                      | Painted turtle (Chrysemys_picta_bellii-3.0.3) | ABCA3-201  | <a href="#">ENSCPBT00000000241.1</a>  | 10045                 | <a href="#">1707aa</a>    |
| 10                     | Bengalese finch (LonStrDom1)                  | ABCA3-201  | <a href="#">ENSLSDT00000001885.1</a>  | 7684                  | <a href="#">1708aa</a>    |
| 11                     | Komodo dragon (ASM479886v1)                   | ABCA3-201  | <a href="#">ENSVKKT00000016923.1</a>  | 5639                  | <a href="#">1708aa</a>    |
| ABCA4                  |                                               |            |                                       |                       |                           |
| 1                      | Human (GRCh38.p13)                            | ABCA4-201  | <a href="#">ENST00000370225.4</a>     | 7328                  | <a href="#">2273aa</a>    |
| 2                      | Angola Colobus (Cang.pa_1.0)                  | ABCA4-201  | <a href="#">ENSCANT000000061435.1</a> | 7323                  | <a href="#">2273aa</a>    |
| 3                      | Tarsier (Tarsius_syrichta-2.0.1)              | ABCA4-201  | <a href="#">ENSTSYT00000013324.2</a>  | 6965                  | <a href="#">2273aa</a>    |
| 4                      | Mouse (GRCm38.p6)                             | Abca4-201  | <a href="#">ENSMUST00000013995.12</a> | 7263                  | <a href="#">2310aa</a>    |
| 5                      | Degu (OctDeg1.0)                              | ABCA4-201  | <a href="#">ENSODET00000007042.1</a>  | 7064                  | <a href="#">2326aa</a>    |
| 6                      | Cow (ARS-UCD1.2)                              | ABCA4-201  | <a href="#">ENSBTAT00000023982.6</a>  | 7708                  | <a href="#">2281aa</a>    |
| 7                      | Pig (Sscrofa11.1)                             | ABCA4-201  | <a href="#">ENSSSCT00000007545.4</a>  | 7084                  | <a href="#">2320aa</a>    |
| 8                      | Dog (CanFam3.1)                               | ABCA4-201  | <a href="#">ENSCAFT00000005367.5</a>  | 7014                  | <a href="#">2321aa</a>    |
| 9                      | Painted Turtle (Chrysemys_picta_bellii-3.0.3) | ABCA4-201  | <a href="#">ENSCPBT000000028705.1</a> | 7340                  | <a href="#">2332aa</a>    |
| 10                     | Chicken (GRCg6a)                              | ABCA4-201  | <a href="#">ENSGALT00000009238.5</a>  | 6839                  | <a href="#">2272aa</a>    |
| 11                     | Yellowtail amberjack (Sedor1)                 | abca4a-201 | <a href="#">ENSSLDT00000010988.1</a>  | 9812                  | <a href="#">2271aa</a>    |
| ABCA5                  |                                               |            |                                       |                       |                           |
| 1                      | Human (GRCh38.p13)                            | ABCA5-201  | <a href="#">ENST00000392676.8</a>     | 8252                  | <a href="#">1642aa</a>    |
| 2                      | Vervet-AGM (ChlSab1.1)                        | ABCA5-201  | <a href="#">ENSCSAT00000002404.1</a>  | 8510                  | <a href="#">1642aa</a>    |
| 3                      | Ugandan red Colobus (ASM277652v2)             | ABCA5-201  | <a href="#">ENSPTE00000004315.1</a>   | 5314                  | <a href="#">1642aa</a>    |
| 4                      | Mouse (GRCm38.p6)                             | Abca5-201  | <a href="#">ENSMUST00000043961.11</a> | 8231                  | <a href="#">1642aa</a>    |
| 5                      | Golden Hamster (MesAur1.0)                    | Abca5-201  | <a href="#">ENSMAUT00000013769.1</a>  | 8811                  | <a href="#">1642aa</a>    |
| 6                      | Cow (ARS-UCD1.2)                              | ABCA5-201  | <a href="#">ENSBTAT00000003563.6</a>  | 5791                  | <a href="#">1562aa</a>    |
| 7                      | Canada lynx (mLynCan4_v1.p)                   | ABCA5-201  | <a href="#">ENSLCNT000005037861.1</a> | 5268                  | <a href="#">1642aa</a>    |
| 8                      | Great spotted kiwi (aptHaa1)                  | ABCA5-201  | <a href="#">ENSAHAT000000029191.1</a> | 5076                  | <a href="#">1646aa</a>    |
| 9                      | Chicken (GRCg6a)                              | ABCA5-201  | <a href="#">ENSGALT00000006907.6</a>  | 5164                  | <a href="#">1647aa</a>    |
| 10                     | Australian saltwater crocodile (CroPor_comp1) | ABCA5-201  | <a href="#">ENSCPRT000005031181.1</a> | 5486                  | <a href="#">1646aa</a>    |
| 11                     | Agassiz's desert tortoise (ASM289641v1)       | ABCA5-201  | <a href="#">ENSGAGT00000040318.1</a>  | 5018                  | <a href="#">1646aa</a>    |
| ABCA6                  |                                               |            |                                       |                       |                           |
| 1                      | Human (GRCh38.p13)                            | ABCA6-201  | <a href="#">ENST00000284425.7</a>     | 5321                  | <a href="#">1617aa</a>    |
| 2                      | Bolivian squirrel monkey (SaiBol1.0)          | ABCA6-201  | <a href="#">ENSSBOT00000048276.1</a>  | 5912                  | <a href="#">1631aa</a>    |
| 3                      | Vervet-AGM (ChlSab1.1)                        | ABCA6-201  | <a href="#">ENSCSAT00000002382.1</a>  | 5560                  | <a href="#">1618aa</a>    |
| 4                      | Golden snub-nosed monkey (Rrox_v1)            | ABCA6-201  | <a href="#">ENSRROT00000016366.1</a>  | 5427                  | <a href="#">1618aa</a>    |
| 5                      | Squirrel (SpeTri2.0)                          | ABCA6-201  | <a href="#">ENSSTOT00000013298.3</a>  | 6087                  | <a href="#">1629aa</a>    |
| 6                      | Rabbit (OryCun2.0)                            | ABCA6-201  | <a href="#">ENSOCTU00000014391.4</a>  | 5012                  | <a href="#">1618aa</a>    |
| 7                      | Mouse (GRCm38.p6)                             | Abca6-201  | <a href="#">ENSMUST00000044003.13</a> | 5240                  | <a href="#">1624aa</a>    |
| 8                      | Guinea Pig (Cavpor3.0)                        | ABCA6-201  | <a href="#">ENSCPOT00000042666.1</a>  | 6044                  | <a href="#">1465aa</a>    |
| 9                      | Meerkat (meerkat_22Aug2017_6uvM2_HiC)         | ABCA6-201  | <a href="#">ENSSSUT000005033782.1</a> | 5383                  | <a href="#">1616aa</a>    |
| 10                     | Ferret (MusPutFur1.0)                         | ABCA6-201  | <a href="#">ENSMPUT00000014462.1</a>  | 5226                  | <a href="#">1621aa</a>    |
| 11                     | Arabian camel (CamDro2)                       | ABCA6-201  | <a href="#">ENSCDRT000005031706.1</a> | 5494                  | <a href="#">1576aa</a>    |

No., Number; Tr., Transcript;

Table S1: Continued.

| Gene/<br>No. of<br>Tr. | Species (Assembly)                                    | Tr. Name       | Tr. ID                                | Tr.<br>Length<br>(bp) | Protein<br>Length<br>(aa) |
|------------------------|-------------------------------------------------------|----------------|---------------------------------------|-----------------------|---------------------------|
| ABCA7                  |                                                       |                |                                       |                       |                           |
| 1                      | Human (GRCh38.p13)                                    | ABCA7-201      | <a href="#">ENST00000263094.11</a>    | 6815                  | <a href="#">2146aa</a>    |
| 2                      | Vervet-AGM (ChlSab1.1)                                | ABCA7-201      | <a href="#">ENSCSAT00000010455.1</a>  | 6768                  | <a href="#">2149aa</a>    |
| 3                      | Macaque (Mmul_10)                                     | ABCA7-202      | <a href="#">ENSMUT00000021458.4</a>   | 6830                  | <a href="#">2111aa</a>    |
| 4                      | Bolivian squirrel monkey (SaiBol1.0)                  | ABCA7-201      | <a href="#">ENSBOT00000024453.1</a>   | 7030                  | <a href="#">2144aa</a>    |
| 5                      | Mouse (GRCm38.p6)                                     | Abca7-202      | <a href="#">ENSMUST00000132517.7</a>  | 6696                  | <a href="#">2159aa</a>    |
| 6                      | Prairie vole (MicOch1.0)                              | Abca7-201      | <a href="#">ENSMOCT00000014061.1</a>  | 6688                  | <a href="#">2161aa</a>    |
| 7                      | Pig (Sscrofa11.1)                                     | ABCA7-201      | <a href="#">ENSSSCT00000061946.2</a>  | 6978                  | <a href="#">2206aa</a>    |
| 8                      | Ferret (MusPutFur1.0)                                 | ABCA7-201      | <a href="#">ENSMPUT00000009091.1</a>  | 6769                  | <a href="#">2152aa</a>    |
| 9                      | Goat (ARS1)                                           | ABCA7-201      | <a href="#">ENSCHIT00000035014.1</a>  | 6583                  | <a href="#">2152aa</a>    |
| 10                     | Painted turtle (Chrysemys_picta_bellii-3.0.3)         | ABCA7-201      | <a href="#">ENSCPBT00000015380.1</a>  | 3646                  | <a href="#">1100aa</a>    |
| 11                     | Spotted gar (LepOcu1)                                 | zgc:172302-201 | <a href="#">ENSLOCT00000002958.1</a>  | 6925                  | <a href="#">2237aa</a>    |
| ABCA8                  |                                                       |                |                                       |                       |                           |
| 1                      | Human (GRCh38.p13)                                    | ABCA8-208      | <a href="#">ENST00000586539.6</a>     | 6002                  | <a href="#">1621aa</a>    |
| 2                      | Bolivian squirrel monkey (SaiBol1.0)                  | ABCA8-202      | <a href="#">ENSBOT00000054772.1</a>   | 7060                  | <a href="#">1621aa</a>    |
| 3                      | Macaque (Mmul_10)                                     | ABCA8-201      | <a href="#">ENSMUT00000078307.2</a>   | 5789                  | <a href="#">1621aa</a>    |
| 4                      | Mouse Lemur (Mmur_3.0)                                | ABCA8-201      | <a href="#">ENSMICT00000039031.2</a>  | 5815                  | <a href="#">1623aa</a>    |
| 5                      | Vervet-AGM (ChlSab1.1)                                | ABCA8-201      | <a href="#">ENSCSAT00000002281.1</a>  | 5115                  | <a href="#">1623aa</a>    |
| 6                      | Long-tailed chinchilla (ChilAn1.0)                    | ABCA8-202      | <a href="#">ENSLAT00000005785.1</a>   | 9636                  | <a href="#">1621aa</a>    |
| 7                      | Rabbit (OryCun2.0)                                    | ABCA8-201      | <a href="#">ENSOCUT00000008019.4</a>  | 5036                  | <a href="#">1596aa</a>    |
| 8                      | Mouse (GRCm38.p6)                                     | Abca8b-201     | <a href="#">ENSMUST00000020948.14</a> | 7423                  | <a href="#">1620aa</a>    |
| 9                      | Red fox (VulVul2.2)                                   | ABCA8-203      | <a href="#">ENSVVUT00000013657.1</a>  | 5836                  | <a href="#">1622aa</a>    |
| 10                     | Meerkat (meerkat_22Aug2017_6uvM2_HiC)                 | ABCA8-201      | <a href="#">ENSSSUT00005032074.1</a>  | 5804                  | <a href="#">1623aa</a>    |
| 11                     | Pig (Sscrofa11.1)                                     | ABCA8-205      | <a href="#">ENSSSCT00000054209.2</a>  | 5560                  | <a href="#">1566aa</a>    |
| ABCA9                  |                                                       |                |                                       |                       |                           |
| 1                      | Human (GRCh38.p13)                                    | ABCA9-201      | <a href="#">ENST00000340001.9</a>     | 6377                  | <a href="#">1624aa</a>    |
| 2                      | Angola colobus (Cang.pa_1.0)                          | ABCA9-201      | <a href="#">ENSCANT00000048814.1</a>  | 6543                  | <a href="#">1624aa</a>    |
| 3                      | Drill (Mleu.le_1.0)                                   | ABCA9-201      | <a href="#">ENSMLET00000054252.1</a>  | 5631                  | <a href="#">1624aa</a>    |
| 4                      | Mouse Lemur (Mmur_3.0)                                | ABCA9-201      | <a href="#">ENSMICT00000032785.2</a>  | 5716                  | <a href="#">1625aa</a>    |
| 5                      | Long-tailed chinchilla (ChilAn1.0)                    | ABCA9-201      | <a href="#">ENSLAT00000011024.1</a>   | 8852                  | <a href="#">1624aa</a>    |
| 6                      | Kangaroo rat (Dord_2.0)                               | Abca9-201      | <a href="#">ENSODRT00000003286.2</a>  | 5616                  | <a href="#">1629aa</a>    |
| 7                      | Prairie vole (MicOch1.0)                              | Abca9-201      | <a href="#">ENSMOCT00000019981.1</a>  | 6685                  | <a href="#">1624aa</a>    |
| 8                      | Mouse (GRCm38.p6)                                     | Abca9-201      | <a href="#">ENSMUST00000044850.3</a>  | 6384                  | <a href="#">1623aa</a>    |
| 9                      | Pig (Sscrofa11.1)                                     | ABCA9-201      | <a href="#">ENSSSCT00000023395.3</a>  | 6543                  | <a href="#">1623aa</a>    |
| 10                     | Canada lynx (mLynCan4_v1.p)                           | ABCA9-201      | <a href="#">ENSLCNT00005034192.1</a>  | 7010                  | <a href="#">1625aa</a>    |
| 11                     | Armadillo (Dasnov3.0)                                 | ABCA9-202      | <a href="#">ENSNOT00000033964.1</a>   | 9505                  | <a href="#">1626aa</a>    |
| ABCA10                 |                                                       |                |                                       |                       |                           |
| 1                      | Human (GRCh38.p13)                                    | ABCA10-201     | <a href="#">ENST00000269081.8</a>     | 6362                  | <a href="#">1543aa</a>    |
| 2                      | Angola colobus (Cang.pa_1.0)                          | ABCA10-201     | <a href="#">ENSCANT00000059450.1</a>  | 6361                  | <a href="#">1545aa</a>    |
| 3                      | Meerkat (meerkat_22Aug2017_6uvM2_HiC)                 | ABCA10-201     | <a href="#">ENSSSUT00005034007.1</a>  | 5313                  | <a href="#">1486aa</a>    |
| 4                      | Canada lynx (mLynCan4_v1.p)                           | ABCA10-201     | <a href="#">ENSLCNT00005037701.1</a>  | 5323                  | <a href="#">1368aa</a>    |
| 5                      | Arabian camel (CamDro2)                               | ABCA10-201     | <a href="#">ENSCDRT00005030804.1</a>  | 5715                  | <a href="#">1613aa</a>    |
| 6                      | Wild yak (BosGru_v2.0)                                | ABCA10-201     | <a href="#">ENSBMUT00000035871.1</a>  | 5855                  | <a href="#">1630aa</a>    |
| 7                      | Common canary (SCA1)                                  | ABCA10-201     | <a href="#">ENSSCAT00000020843.1</a>  | 4992                  | <a href="#">1539aa</a>    |
| 8                      | White-throated sparrow (Zonotrichia_albicollis-1.0.1) | ABCA10-201     | <a href="#">ENSZALT00000008796.1</a>  | 4981                  | <a href="#">1462aa</a>    |
| ABCA12                 |                                                       |                |                                       |                       |                           |
| 1                      | Human (GRCh38.p13)                                    | ABCA12-201     | <a href="#">ENST00000272895.12</a>    | 9298                  | <a href="#">2595aa</a>    |
| 2                      | Pig-tailed macaque (Mnem_1.0)                         | ABCA12-201     | <a href="#">ENSMNET00000037858.1</a>  | 9239                  | <a href="#">2595aa</a>    |
| 3                      | Marmoset (ASM275486v1)                                | ABCA12-201     | <a href="#">ENSCJAT00000022637.4</a>  | 8233                  | <a href="#">2595aa</a>    |
| 4                      | Rabbit (OryCun2.0)                                    | ABCA12-201     | <a href="#">ENSOCUT00000044085.1</a>  | 8127                  | <a href="#">2577aa</a>    |
| 5                      | Prairie vole (MicOch1.0)                              | Abca12-201     | <a href="#">ENSMOCT00000019649.1</a>  | 8349                  | <a href="#">2596aa</a>    |
| 6                      | Mouse (GRCm38.p6)                                     | Abca12-201     | <a href="#">ENSMUST00000087268.6</a>  | 9137                  | <a href="#">2595aa</a>    |
| 7                      | Long-tailed chinchilla (ChilAn1.0)                    | ABCA12-201     | <a href="#">ENSLAT00000009751.1</a>   | 8872                  | <a href="#">2598aa</a>    |
| 8                      | Red fox (VulVul2.2)                                   | ABCA12-201     | <a href="#">ENSVVUT00000015996.1</a>  | 8674                  | <a href="#">2597aa</a>    |
| 9                      | Pig (Sscrofa11.1)                                     | ABCA12-201     | <a href="#">ENSSSCT00000042475.2</a>  | 9336                  | <a href="#">2593aa</a>    |
| 10                     | Chinese softshell turtle (PelSin_1.0)                 | ABCA12-201     | <a href="#">ENSPSIT00000017400.1</a>  | 8344                  | <a href="#">2585aa</a>    |
| 11                     | African ostrich (ASM69896v1)                          | ABCA12-202     | <a href="#">ENSSCUT00000023862.1</a>  | 6601                  | <a href="#">2122aa</a>    |
| ABCA13                 |                                                       |                |                                       |                       |                           |
| 1                      | Human (GRCh38.p13)                                    | ABCA13-204     | <a href="#">ENST00000435803.6</a>     | 17188                 | <a href="#">5058aa</a>    |
| 2                      | Angola colobus (Cang.pa_1.0)                          | ABCA13-201     | <a href="#">ENSCANT00000056247.1</a>  | 15590                 | <a href="#">5057aa</a>    |
| 3                      | Mouse (GRCm38.p6)                                     | Abca13-201     | <a href="#">ENSMUST00000042740.12</a> | 16011                 | <a href="#">5034aa</a>    |

No., Number; Tr., Transcript;

**Table S2:** A detailed overview of 5'UTR features in the human ABCA genes.

| Gene Abbr. | 5'UTR length [nt] | No. of uATGs | uATG pos.                                                                                                                  | uATG cons.                                                                        | uATG fl. seq. context                                                   | uATG TIS score                                                                                                                             | No. of uORFs | uORF start  | uORF end   | uORF length [nt] | Ribo-seq cov. | sATG fl. seq. context |
|------------|-------------------|--------------|----------------------------------------------------------------------------------------------------------------------------|-----------------------------------------------------------------------------------|-------------------------------------------------------------------------|--------------------------------------------------------------------------------------------------------------------------------------------|--------------|-------------|------------|------------------|---------------|-----------------------|
| <b>A3</b>  | 694               | 4            | -525<br>-498<br>-329<br>-262                                                                                               | 3<br>4<br>1<br>1                                                                  | 2<br>1<br>2<br>1                                                        | 0.718<br>0.629<br>0.367<br>0.368                                                                                                           | 2            | -525        | -376       | 150              | 3             | 3                     |
| <b>A1</b>  | 313               | 1            | -89                                                                                                                        | 5                                                                                 | 1                                                                       | 0.187                                                                                                                                      | 1            | -262<br>-89 | >+1<br>>+1 | >261<br>>87      | 2<br>3        | 3                     |
| <b>A4</b>  | 103               | 1            | -62                                                                                                                        | 3                                                                                 | 1                                                                       | 0.047                                                                                                                                      | 0            |             |            |                  |               | 3                     |
| <b>A5</b>  | 97                | 0            |                                                                                                                            |                                                                                   |                                                                         |                                                                                                                                            | 0            |             |            |                  |               | 2                     |
| <b>A10</b> | 910               | 14           | -755<br>-722<br>-709<br>-645<br>-625<br>-574<br>-571<br>-482<br>-464<br>-279<br>-265<br>-197<br>-169<br>-56<br>-144<br>-32 | 1<br>1<br>1<br>4<br>1<br>1<br>0<br>1<br>3<br>3<br>3<br>3<br>3<br>3<br>1<br>3<br>1 | 2<br>2<br>1<br>2<br>1<br>1<br>2<br>3<br>1<br>3<br>3<br>3<br>2<br>2<br>2 | 0.217<br>0.379<br>0.19<br>0.529<br>0.306<br>0.187<br>0.311<br>0.355<br>0.402<br>0.175<br>0.625<br>0.46<br>0.323<br>0.074<br>0.356<br>0.102 | 6            | -722        | -690       | 33               | 1             |                       |
| <b>A6</b>  | 196               | 2            | -398<br>-333<br>-330<br>-115                                                                                               | 1<br>4<br>1<br>4                                                                  | 2<br>1<br>2<br>2                                                        | 0.233<br>0.306<br>0.279<br>0.31                                                                                                            | 0            |             |            |                  |               | 1                     |
| <b>A12</b> | 418               | 4            |                                                                                                                            |                                                                                   |                                                                         |                                                                                                                                            | 1            | -398        | -330       | 69               | 1             | 3                     |
| <b>A13</b> | 26                | 0            |                                                                                                                            |                                                                                   |                                                                         |                                                                                                                                            | 0            |             |            |                  |               | 3                     |
| <b>A9</b>  | 75                | 3            | -70<br>-58<br>-54                                                                                                          | 3<br>1<br>3                                                                       | 2<br>2<br>1                                                             | 0.1<br>0.098<br>0.056                                                                                                                      | 2            | -70         | -38        | 33               | 1             | 2                     |
| <b>A8</b>  | 340               | 6            | -265<br>-243<br>-152<br>-149<br>-135<br>-79                                                                                | 0<br>1<br>0<br>0<br>0<br>0                                                        | 2<br>2<br>2<br>2<br>2<br>2                                              | 0.206<br>0.547<br>0.211<br>0.285<br>0.362<br>0.085                                                                                         | 2            | -243        | -205       | 39               | 3             | 2                     |
| <b>A7</b>  | 227               | 1            | -103                                                                                                                       | 3                                                                                 | 2                                                                       | 0.359                                                                                                                                      | 1            | -79<br>-103 | -5<br>>+1  | 75<br>>102       | 1<br>3        | 3                     |
| <b>A2</b>  | 97                | 1            | -88                                                                                                                        | 2                                                                                 | 2                                                                       | 0.108                                                                                                                                      | 1            | -88         | -23        | 66               | 1             | 3                     |

Abbr., abbreviation; Cons., conservation/conserved; Cov., coverage; Fl., flanking; Fo., forming; No., number; Pos., position (from sATG); Reg., region; sATG, start ATG of the main ORF; Seq., sequence; St., stem; TSS, transcription start site; TIS, translation initiation start; uATG, upstream ATG

**uATG conservation:** 0=Human, 1=Primates, 2=Pr + Rodents, 3=Placental mammals, 4=Plac. mam. + Reptiles and birds, 5=Plac. mam. + Rep. and bi. + Coelacanth/ray-finned fishes; **uATG/sATG flanking sequence context:** 1) weak (NNN(C/U)NNAUG(A/C/U), 2) adequate (NNN(A/G)NNAUG(A/C/U) or NNN(C/U)NNAUGG, 3) strong (NNN(A/G)NNAUGG, 4) optimal (GCC(A/G)CCAUGG), (Hernandez et al., 2019); **uATG TIS score (NetStart software):** The scores are in [0.0, 1.0]; when greater than 0.5 they represent a probable translation start; **Ribo-seq coverage:** 1=Low, 2=Medium, 3=High

Table S2: Continued.

| Gene Abbr. | Most cons. reg. pos.                | No. of 5'UTR introns | Intron pos.                      | Intron length [nt]    | RG4-fo. seq. pos. | No. of 5'UTR st. loops | No. of all 5'UTR elements |
|------------|-------------------------------------|----------------------|----------------------------------|-----------------------|-------------------|------------------------|---------------------------|
| <b>A3</b>  | -519.-503                           | 3                    | -539/538<br>-332/331<br>-27/26   | 10718<br>890<br>1960  | -608.-576         | 5                      | 13                        |
| <b>A1</b>  | -119.-59                            | 1                    | -93/92                           | 24163                 | -251.-218         | 6                      | 9                         |
| <b>A4</b>  | -65.-50                             | 0                    |                                  | 0                     |                   | 2                      | 3                         |
| <b>A5</b>  | -7.-2                               | 1                    | -16/15                           | 12621                 |                   | 4                      | 5                         |
| <b>A10</b> | -459.-368                           | 3                    | -593/592<br>-313/312<br>-172/171 | 15668<br>1295<br>1615 |                   | 5                      | 22                        |
| <b>A6</b>  | -156.-63                            | 1                    | -46/45                           | 996                   |                   | 3                      | 6                         |
| <b>A12</b> | -342.-318<br>-269.-231<br>-120.-102 | 0                    |                                  | 0                     |                   | 6                      | 10                        |
| <b>A13</b> |                                     | 0                    |                                  | 0                     |                   | 0                      | 0                         |
| <b>A9</b>  | -75.-60<br>-46.-14                  | 1                    | -14/13                           | 9726                  |                   | 2                      | 6                         |
| <b>A8</b>  | -234.-180                           | 2                    | -167/166<br>-6/5                 | 5746<br>7272          |                   | 3                      | 11                        |
| <b>A7</b>  | -137.-73                            | 1                    | -138/137                         | 1028                  | -217.-158         | 3                      | 6                         |
| <b>A2</b>  | -65.-12                             | 0                    |                                  | 0                     | -81.-34           | 2                      | 4                         |

Abbr., abbreviation; Cons., conservation/conserved; Cov., coverage; Fl., flanking; Fo., forming; No., number; Pos., position (from sATG); Reg., region; sATG, start ATG of the main ORF; Seq., sequence; St., stem; TSS, transcription start site; TIS, translation initiation start; uATG, upstream ATG

**uATG conservation:** 0=Human, 1=Primates, 2=Pr + Rodents, 3=Placental mammals, 4=Plac. mam. + Reptiles and birds, 5=Plac. mam. + Rep. and bi. + Coelacanth/ray-finned fishes; **uATG/sATG flanking sequence context:** 1) weak (NNN(C/U)NNAUG(A/C/U), 2) adequate (NNN(A/G)NNAUG(A/C/U) or NNN(C/U)NNAUGG, 3) strong (NNN(A/G)NNAUGG, 4) optimal (GCC(A/G)CCAUGG), (Hernandez et al., 2019); **uATG TIS score (NetStart software):** The scores are in [0.0, 1.0]; when greater than 0.5 they represent a probable translation start; **Ribo-seq coverage:** 1=Low, 2=Medium, 3=High

**Table S3:** Correlation tables of the first correlation analysis with Spearman's rs and Kendall's tau coefficients and relevant p values

| Sperman rs /p value  | 5'U. length | No. uATGs | sATG cont. | No. introns | Int. length | No. RG4s | No. st. loops | Prot. distrib. | Prot. expres. |
|----------------------|-------------|-----------|------------|-------------|-------------|----------|---------------|----------------|---------------|
| 5'U. length          |             | 0.004     | 0.975      | 0.037       | 0.074       | 0.577    | 0.002         | 0.283          | 0.166         |
| No. uATGs            | 0.759       |           | 0.305      | 0.041       | 0.216       | 0.626    | 0.174         | 0.348          | 0.338         |
| sATG cont.           | 0.010       | -0.324    |            | 0.119       | 0.336       | 0.046    | 0.975         | 0.226          | 0.749         |
| No. introns          | 0.606       | 0.596     | -0.475     |             | 0.000       | 0.737    | 0.145         | 0.832          | 0.388         |
| Int. length          | 0.533       | 0.385     | -0.304     | 0.871       |             | 0.463    | 0.042         | 0.411          | 0.818         |
| No. RG4s             | 0.180       | -0.157    | 0.584      | 0.108       | 0.235       |          | 0.515         | 0.925          | 0.448         |
| No. st. loops        | 0.792       | 0.420     | 0.010      | 0.447       | 0.592       | 0.209    |               | 0.530          | 0.640         |
| Prot. distrib.       | -0.355      | -0.314    | -0.398     | 0.073       | 0.276       | 0.032    | 0.213         |                | 0.667         |
| Prot. expres.        | -0.449      | -0.319    | 0.109      | -0.289      | -0.079      | -0.256   | -0.159        | 0.147          |               |
| Kendall tau /p value | 5'U. length | No. uATGs | sATG cont. | No. introns | Int. length | No. RG4s | No. st. loops | Prot. distrib. | Prot. expres. |
| 5'U. length          |             | 0.006     | 1.000      | 0.016       | 0.050       | 0.487    | 0.004         | 0.263          | 0.191         |
| No. uATGs            | 0.603       |           | 0.253      | 0.022       | 0.145       | 0.528    | 0.138         | 0.235          | 0.235         |
| sATG cont.           | 0.000       | -0.252    |            | 0.062       | 0.303       | 0.010    | 0.924         | 0.126          | 0.724         |
| No. introns          | 0.532       | 0.506     | -0.412     |             | 0.000       | 0.648    | 0.062         | 0.748          | 0.335         |
| Int. length          | 0.432       | 0.322     | -0.227     | 0.793       |             | 0.353    | 0.011         | 0.296          | 0.775         |
| No. RG4s             | 0.153       | -0.139    | 0.566      | 0.101       | 0.205       |          | 0.401         | 0.897          | 0.300         |
| No. st. loops        | 0.635       | 0.328     | 0.021      | 0.413       | 0.559       | 0.186    |               | 0.424          | 0.617         |
| Prot. distrib.       | -0.261      | -0.277    | -0.357     | 0.075       | 0.244       | 0.030    | 0.187         |                | 0.510         |
| Prot. expres.        | -0.305      | -0.277    | 0.082      | -0.225      | -0.067      | -0.242   | -0.117        | 0.154          |               |

Abbreviations: 5'U., 5'UTR; Cont., context; Distrib., distribution; Expres., expression; Int., intron; No., number; Prot., protein; RG4, RNA G-quadruplex; sATG, start ATG of the main ORF; St., stem; uATG, upstream ATG.

**Table S4:** Correlation tables of the second correlation analysis with Spearman's rs and Kendall's tau coefficients and relevant p values

| Spearman rs/ p value | uATG pos. | uATG cons. | uATG cont. | uATG TIS sc. |
|----------------------|-----------|------------|------------|--------------|
| uATG pos.            |           | 0.632      | 0.543      | 0.034        |
| uATG cons.           | 0.081     |            | 0.386      | 0.366        |
| uATG cont.           | 0.103     | -0.147     |            | 0.011        |
| uATG TIS sc.         | 0.350     | 0.153      | 0.414      |              |
| Kendall tau/ p value | uATG pos. | uATG cons. | uATG cont. | uATG TIS sc. |
| uATG pos.            |           | 0.629      | 0.507      | 0.031        |
| uATG cons.           | 0.055     |            | 0.277      | 0.341        |
| uATG cont.           | 0.076     | -0.125     |            | 0.003        |
| uATG TIS sc.         | 0.248     | 0.109      | 0.341      |              |

Abbreviations: uATG pos., uATG position (from transcription start site); uATG cons., uATG conservation; uATG cont., uATG flanking sequence context; uATG TIS sc., uATG TIS score (from NetStart);
